# Supplementary material for: Short intron-derived ncRNAs
Source: PubMed Central journal article supplement — Nucleic Acids Res. 2017 Jan 4;45(8):4768–81. doi: 10.1093/nar/gkw1341 (PMC5416886; doi:10.1093/nar/gkw1341), 2017-01-04
Supplement: gkw1341_Supp.pdf [file gkw1341_Supp.pdf]

## SUPPLEMENTARY INFORMATION

### Short Intron-Derived ncRNAs

Florent Hubé<sup>1,2,3</sup>, Damien Ulveling<sup>1,2</sup>, Alain Sureau<sup>1,2</sup>, Sabrina Forveille<sup>1,2,4</sup>, Claire Francastel<sup>1,2,3</sup>

<sup>1</sup> Université Paris Diderot, Sorbonne Paris Cité, Paris, France.

<sup>2</sup> Epigénétique et Destin Cellulaire, CNRS UMR 7216, Paris, France.

<sup>3</sup> Corresponding author:

Dr. Florent Hubé

Tel: +33 1 57 27 89 32

Fax: +33 1 57 27 89 10

E-mail: [florent.hube@univ-paris-diderot.fr](mailto:florent.hube@univ-paris-diderot.fr)

<sup>3</sup> Corresponding author:

Dr. Claire Francastel

Tel: +33 1 57 27 89 18

Fax: +33 1 57 27 89 10

E-mail: [claire.francastel@univ-paris-diderot.fr](mailto:claire.francastel@univ-paris-diderot.fr)

UMR7216 - Epigénétique et Destin Cellulaire

Université Paris 7 Diderot

Bâtiment Lamarck - 4ème étage

Case Courrier 7042

35, rue Hélène Brion

75013 PARIS

<sup>4</sup> Present address: Metabolomics and Cell Biology Platforms, Gustave Roussy Cancer Campus, Villejuif, France.

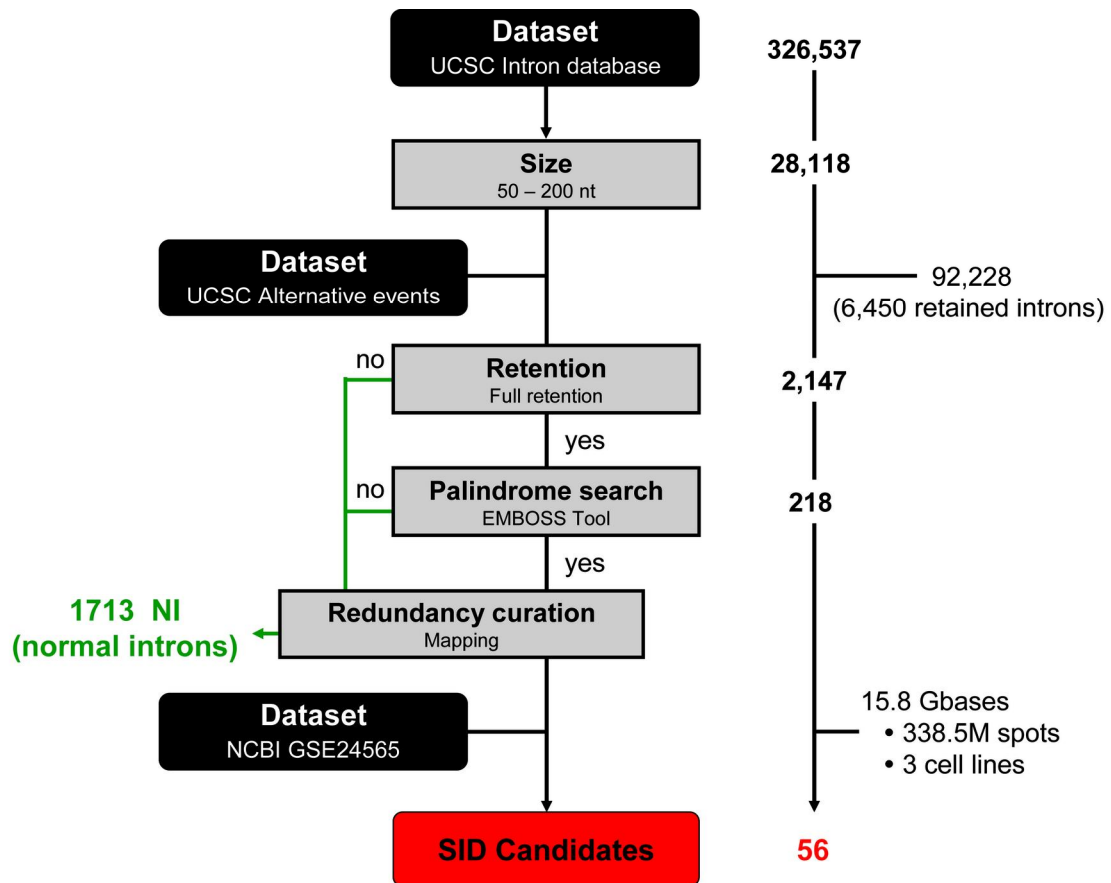

**Supplementary Figure S1** Workflow for the identification of new SID. All datasets used in this study were obtained from the UCSC table browser (<http://genome.ucsc.edu>) using corresponding table tracks as described in the Materials and Methods section. Treatment of data was performed using Galaxy (<http://main.g2.bx.psu.edu>) and freely available tools. The number of sequences used to obtain the two datasets used herein, *i.e.* the SID datasets, containing 56 new candidates expressed in cells (red text), and the normal introns (NI) datasets (green text), are indicated on the right.

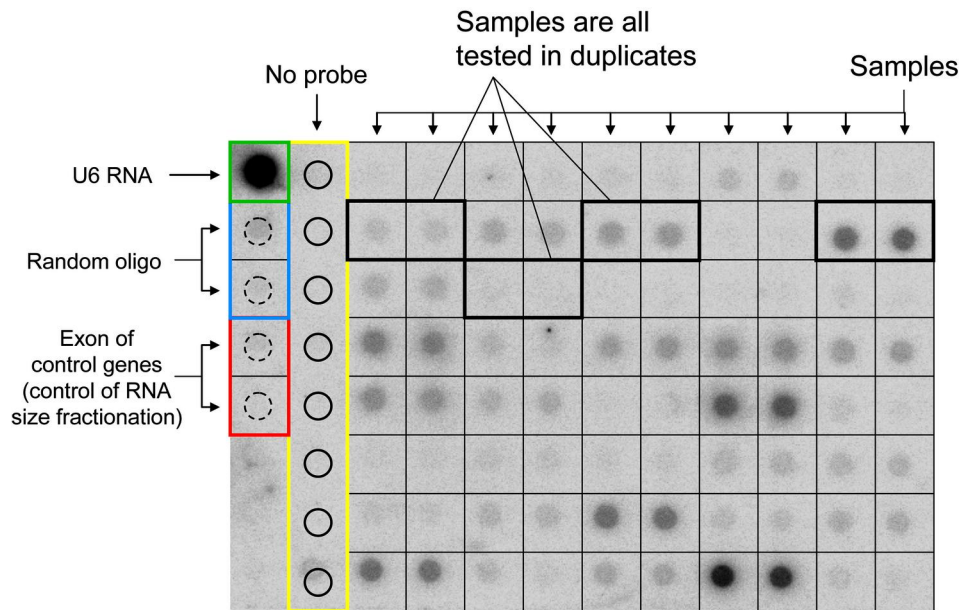

**Supplementary Figure S2** Representative oligonucleotide macro-array. U6 oligonucleotide served as loading control, two random-generated oligonucleotides were used to set the baseline signal and two oligonucleotides matching constitutive exon 4 of GAPDH and exon 4 of SRA mRNA were used as size fractionation controls. All oligonucleotides were spotted as duplicates. This particular slot blot corresponds to the hybridization with small RNAs extracted from wild type HEK-293, and oligonucleotide probes were, from left to right and top to bottom, candidates #1 to #40.

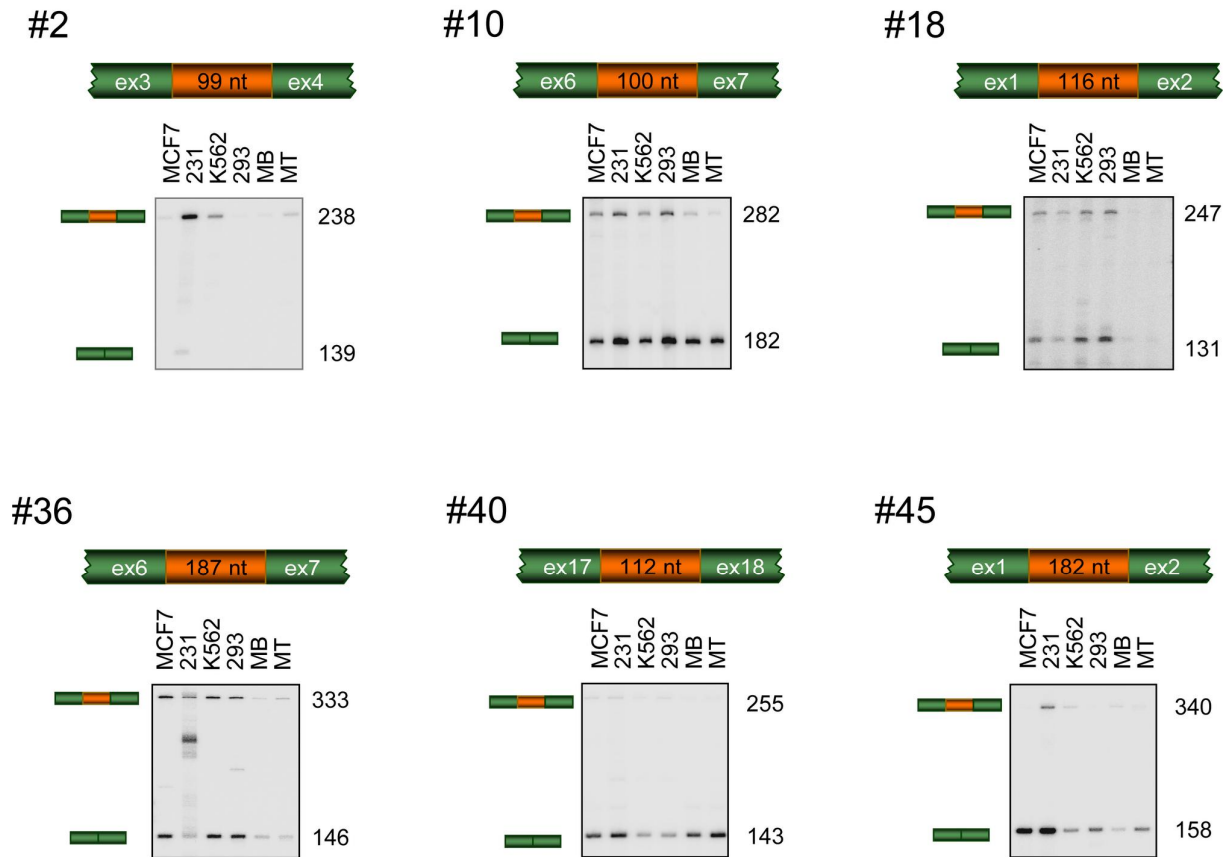

**Supplementary Figure S3** Typical examples of intron retention/excision in SID host-genes in the 6 cell lines tested. Radioactive PCR data was performed as described in Material and Methods using oligonucleotides in flanking exons. The introns of interest (the number of each SID is identified on the top of each panel) is shown in red (its size is indicated), flanking exons are shown in green (the number of each exons is indicated), and size of PCR products are shown on the right of the gel. MCF7, MCF7 cells; 231, MDA-MB-231 cells; K562, K562 cells; 293, HEK-293; MB, primary human satellite (myoblast); MT, *in vitro* differentiated myotubes.

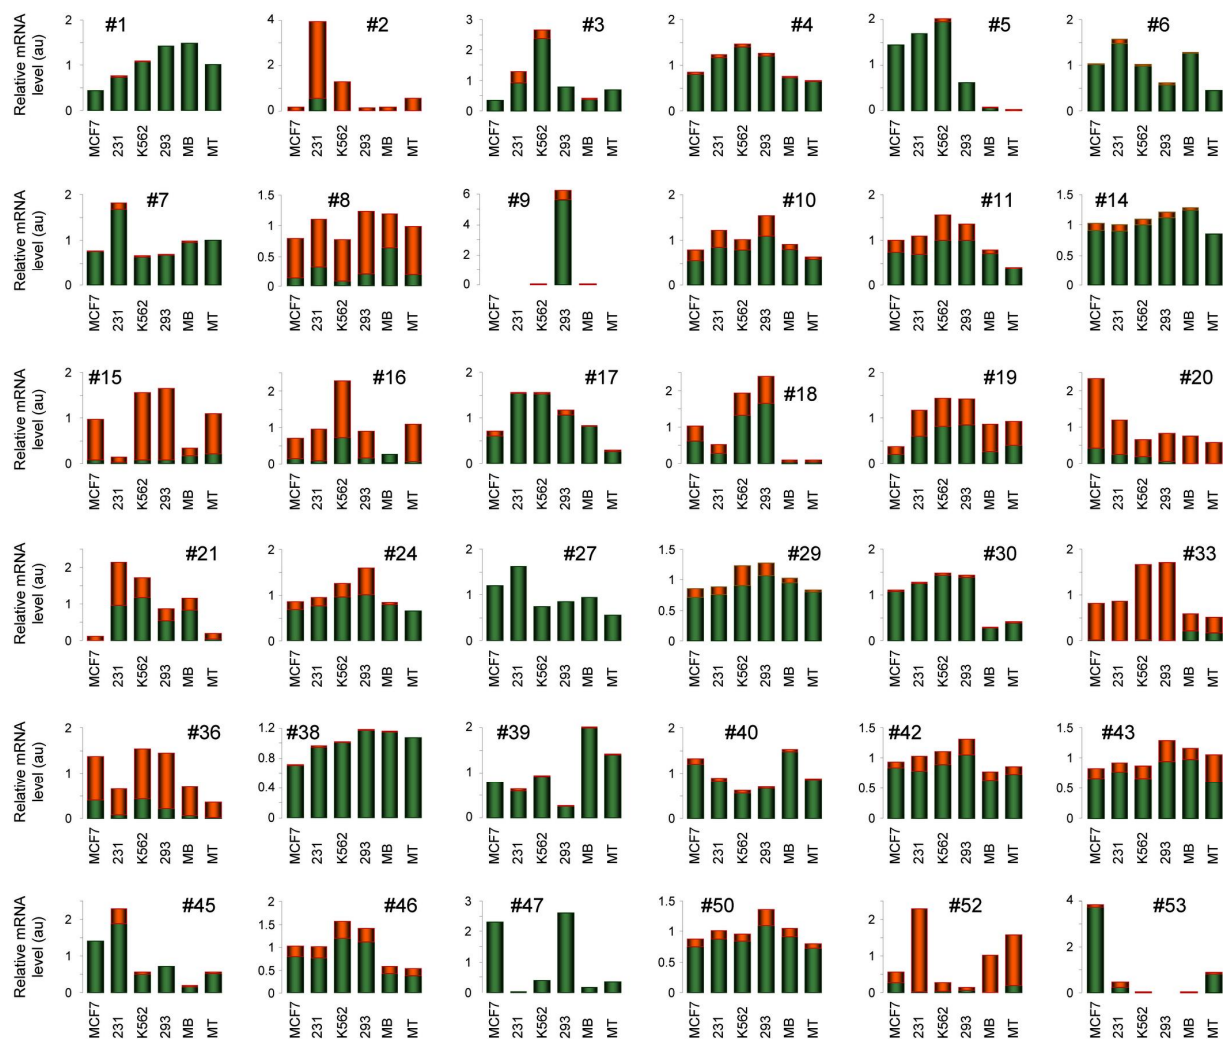

**Supplementary Figure S4** Quantification of intron retention/excision in all 36 host-genes that have shown a signal above baseline levels in the oligonucleotide arrays in at least one of the 6 cell lines tested. Radioactive PCR was performed as described in Material and Methods using oligonucleotides designed in flanking exons. Results are expressed as relative mRNA levels expressed in arbitrary units (au) and corrected relative to the U6 signal for each of the 6 cell lines. The green and red colors correspond to intron excision and retention, respectively. MCF7, MCF7 cells; 231, MDA-MB-231 cells; K562, K562 cells; 293, HEK-293; MB, primary human satellite (myoblast); MT, *in vitro* differentiated myotubes.



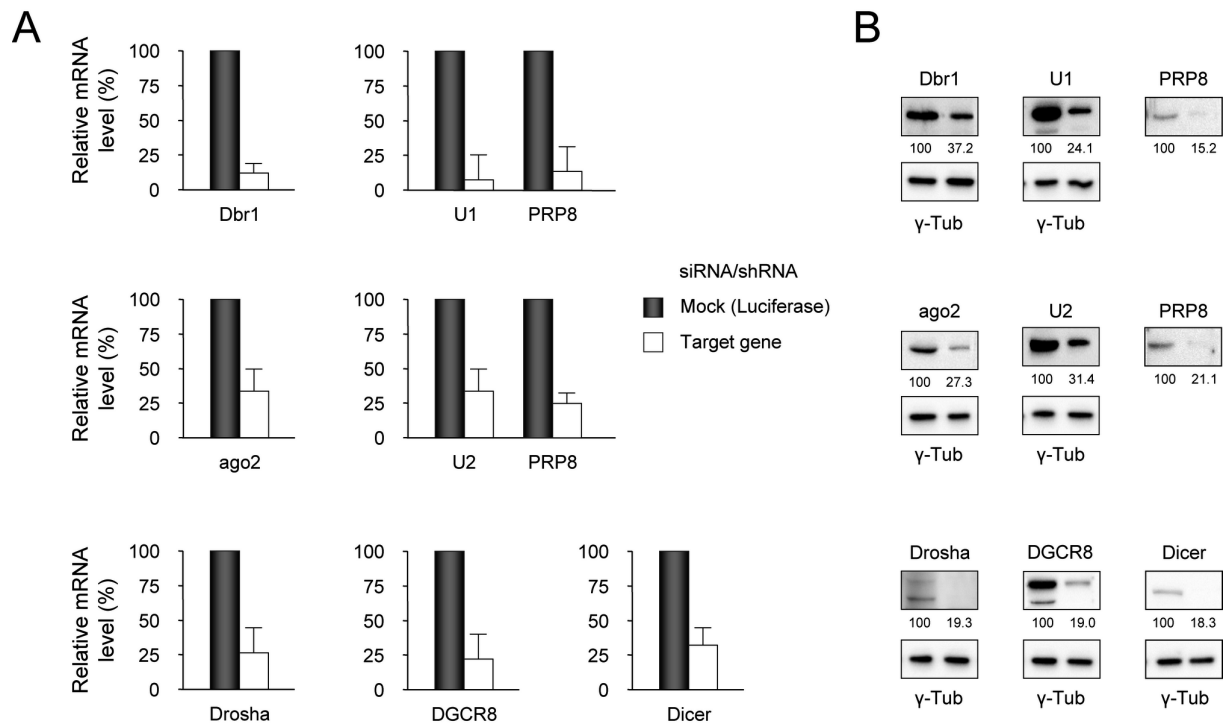

**Supplementary Figure S6** Control of the efficiency of knockdown experiments. RNA interference for each factor was performed as described in Material and Methods section. Knockdown efficiency was assessed by (A) RT-qPCR and (B) Western blot. A quantification of the remaining protein levels after RNA interference and adjusted to the mock control is given below each corresponding panel. U1, snRNP70; U2, U2AF65;  $\gamma$ -Tub, gamma-Tubulin.

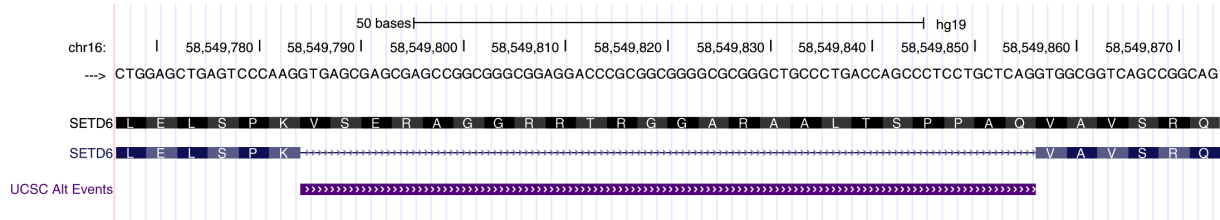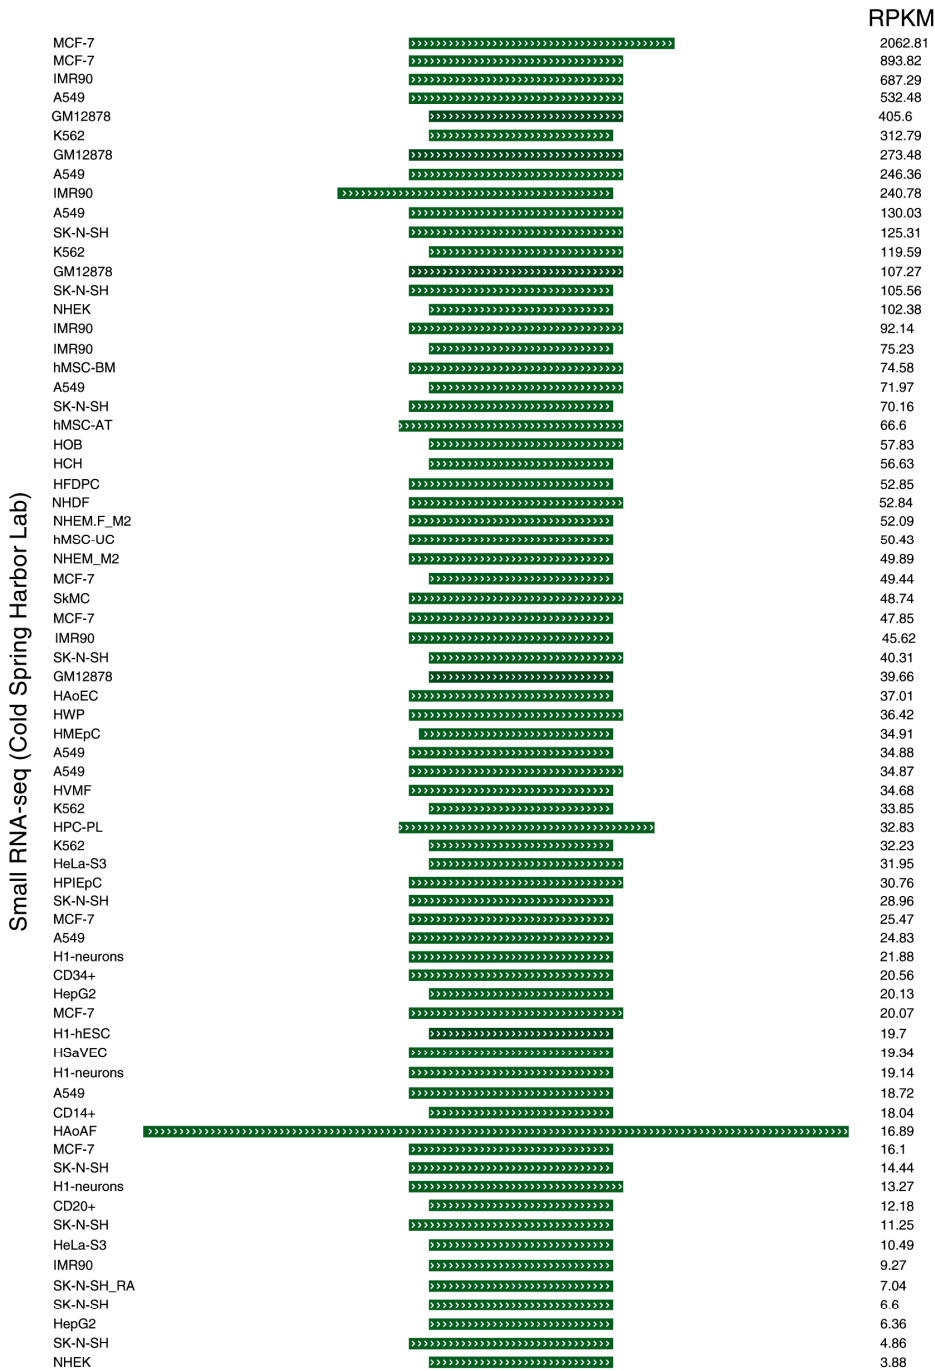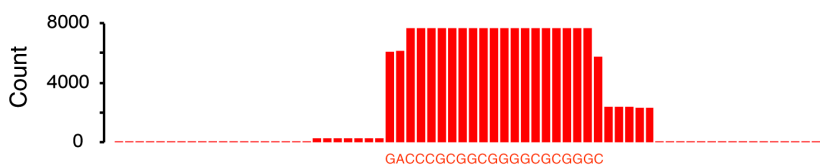



**Supplementary Figure S7** Schematic representation of the human SID #8 located within the 2<sup>nd</sup> intron of SETD6 gene. The reads extracted from Small RNA-seq of Cold Spring Harbor Lab (2) are shown in green. Cell lines are indicated on the left and associated RPKM on the right. Read counts at each position are indicated at the bottom in red, with the predicted mature miRNA sequence used in Figure S8. RPKM, Reads Per Kilobase per Million mapped reads.

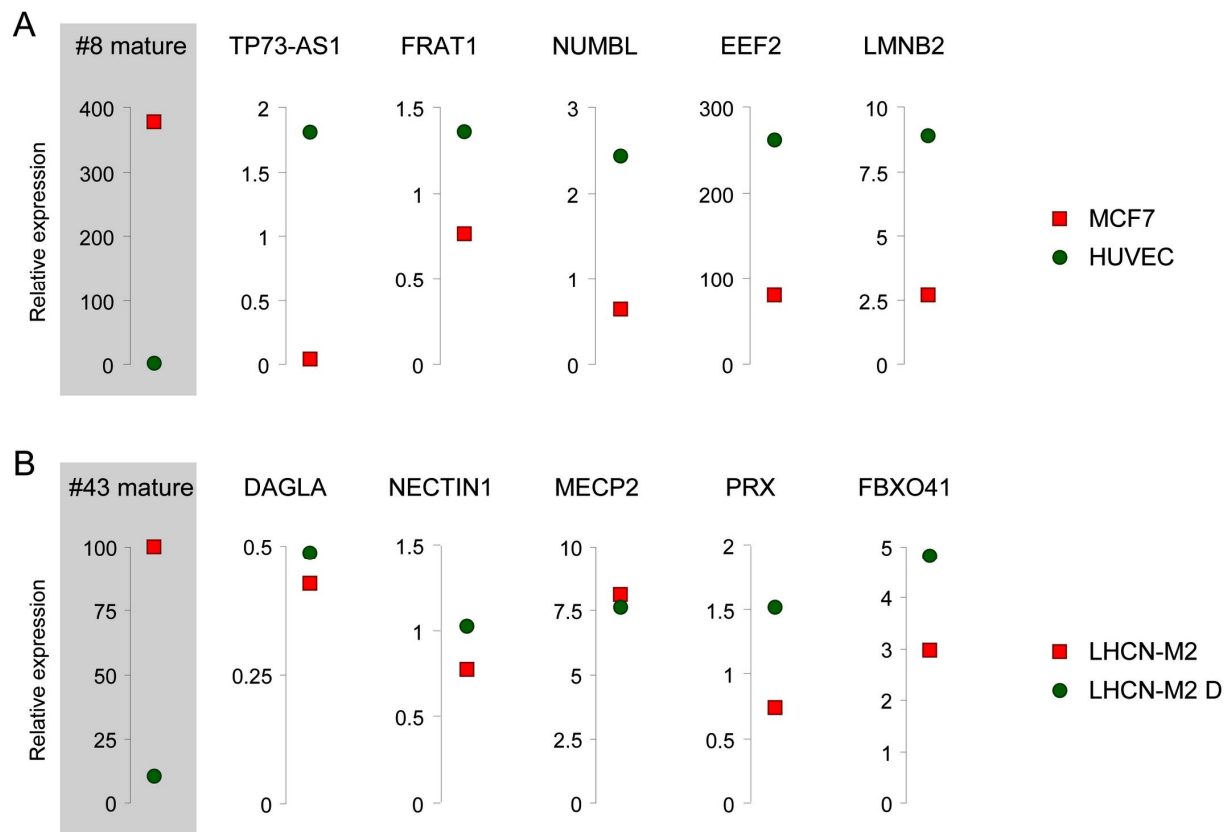

**Supplementary Figure S8** Anti-correlation analysis between expression levels of mature miRNA and its predicted target genes. (A) Expression levels of SID #8-derived mature miRNA and predicted target genes are indicated as mean RPKM extracted from Cold Spring Harbor Lab small and long RNA-seq databases, respectively (2). MCF7 and HUVEC cell lines represent cells with the highest and lowest expression of SID #8-derived miRNA, respectively. (B) The mature sequence of candidate #43 was cloned and sequenced in this study (Figure 7A) and was used to predict target genes. Expression levels of SID #43-derived mature miRNA were measured by Stem-loop RT-qPCR (Figure 7B), and expression levels for its predicted target genes were extracted from Caltech RNA-seq datasets (3). LHCN-M2 and LHCN-M2-D refer to myoblasts and their differentiated myotubes counterparts described in the Methods section, respectively. Target genes were predicted using TargetRank from the Burge Lab [(4); <http://hollywood.mit.edu/targetrank>]. The 5 genes presenting the best score were kept for further analyses. TP73-AS1, TP73 antisense RNA 1; FRAT1, frequently rearranged in advanced T-cell lymphomas 1; NUMBL, NUMB like, endocytic adaptor protein; EEF2, eukaryotic translation elongation factor 2; LMNB2, lamin B2; DAGLA, diacylglycerol lipase alpha; NECTIN1, nectin cell adhesion molecule 1; MECP2, methyl-CpG binding protein 2; PRX, periaxin; FBXO41, F-box protein 41.

**Supplementary Table S1** Descriptive list of the 56 candidate SID, including quantification data of the low-density oligonucleotide arrays for the 6 cell lines tested.

| #  | Chr   | Start     | End       | Strand | Length | intron N <sup>o</sup> /total intron | %GC   | ? G    | -MFE        | CpG island | RefSeq       | Gene Symbol | MCF7 | Fold-above baseline |      |      |      |     | Comments |                |  |
|----|-------|-----------|-----------|--------|--------|-------------------------------------|-------|--------|-------------|------------|--------------|-------------|------|---------------------|------|------|------|-----|----------|----------------|--|
|    |       |           |           |        |        |                                     |       |        |             |            |              |             |      | MDA-MB-231          | K562 | 293  | MB   | MT  |          |                |  |
| 1  | chr1  | 1274819   | 1274961   | -      | 142    | 10/14                               | 71,13 | -68,3  | 0,480985915 |            | NM_004421    | DVL1        | 0,0  | 0,0                 | 0,0  | 0,0  | 0,0  | 0,0 | 1,6      |                |  |
| 2  | chr11 | 65360681  | 65360780  | -      | 99     | 3/3                                 | 67,67 | -44,31 | 0,447575758 |            | NM_033348    | KCNK7       | 0,0  | 0,0                 | 0,0  | 0,0  | 0,0  | 0,1 | 2,5      |                |  |
| 3  | chr16 | 28997890  | 28997977  | +      | 87     | 6/11                                | 67,82 | -39,3  | 0,451724138 |            | NM_001014987 | LAT         | 0,0  | 0,0                 | 0,3  | 0,1  | 0,0  | 0,0 | 2,5      |                |  |
| 4  | chr19 | 9929293   | 9929403   | -      | 110    | 1/2                                 | 76,36 | -50,4  | 0,458181818 | Y          | NM_017703    | FBXL12      | 0,4  | 0,4                 | 0,0  | 0,9  | 0,4  | 0,4 | 3,3      |                |  |
| 5  | chr19 | 55593548  | 55593642  | -      | 94     | 7/11                                | 78,72 | -34,8  | 0,370212766 | Y          | NM_133180    | EPS8L1      | 0,0  | 0,1                 | 0,0  | 0,0  | 0,0  | 0,0 | 1,3      |                |  |
| 6  | chr1  | 109823538 | 109823729 | -      | 191    | 5/7                                 | 61,78 | -79,9  | 0,418324607 |            | NM_001005290 | PSRC1       | 0,2  | 0,4                 | 0,2  | 0,5  | 0,3  | 0,3 | 1,3      |                |  |
| 7  | chr11 | 65479750  | 65479849  | +      | 99     | 1/13                                | 76,77 | -48,7  | 0,491919192 | Y          | NM_006388    | KAT5        | 0,2  | 0,3                 | 0,2  | 3,7  | 0,9  | 0,9 | 2,5      |                |  |
| 8  | chr16 | 58549784  | 58549856  | +      | 72     | 2/3                                 | 80,56 | -36,8  | 0,511111111 | Y          | NM_024860    | SETD6       | 0,9  | 1,4                 | 2,9  | 3,7  | 1,6  | 0,0 | 6,3      |                |  |
| 9  | chr19 | 11689473  | 11689658  | -      | 185    | 1/6                                 | 65,95 | -71,7  | 0,387567568 | Y          | NM_001111035 | ACP5        | 0,0  | 0,2                 | 0,0  | 0,0  | 0,0  | 0,0 | 1,5      |                |  |
| 10 | chr2  | 74900703  | 74900803  | +      | 100    | 6/8                                 | 61    | -40,4  | 0,404       |            | NM_004263    | SEMA4F      | 3,1  | 12,3                | 6,5  | 3,9  | 5,7  | 5,0 | 5,0      |                |  |
| 11 | chr1  | 113238873 | 113239058 | +      | 185    | 13/21                               | 56,76 | -62,6  | 0,338378378 |            | NM_001130079 | MOV10       | 0,5  | 0,9                 | 0,5  | 2,6  | 0,7  | 1,9 | 1,9      |                |  |
| 12 | chr11 | 67815271  | 67815348  | +      | 77     | 12/19                               | 81,82 | -32,4  | 0,420779221 |            | NM_006053    | TCIRG1      | 0,0  | 0,0                 | 0,0  | 0,0  | 0,0  | 0,0 | 0,0      | 0,0            |  |
| 13 | chr16 | 75589871  | 75589968  | -      | 97     | 1/6                                 | 74,23 | -46,1  | 0,475257732 | Y          | NM_001077418 | TMEM231     | 0,0  | 0,0                 | 0,0  | 0,0  | 0,0  | 0,0 | 0,4      |                |  |
| 14 | chr19 | 14070485  | 14070578  | +      | 93     | 8/12                                | 74,19 | -51,4  | 0,552688172 |            | NM_138353    | DCAF15      | 0,3  | 0,2                 | 0,0  | 0,0  | 0,0  | 0,0 | 1,0      |                |  |
| 15 | chr2  | 128180747 | 128180849 | +      | 102    | 5/8                                 | 81,37 | -62,5  | 0,612745098 | Y          | NM_000312    | PROC        | 0,2  | 0,2                 | 0,0  | 1,2  | 0,0  | 0,0 | 1,1      |                |  |
| 16 | chr1  | 156347931 | 156348042 | +      | 111    | 3/10                                | 71,17 | -59,5  | 0,536036036 |            | NM_020407    | RHBG        | 2,0  | 3,3                 | 3,5  | 10,5 | 4,0  | 3,0 | 3,0      |                |  |
| 17 | chr12 | 7076942   | 7077054   | -      | 112    | 5/8                                 | 62,5  | -38,4  | 0,342857143 |            | NM_001144831 | PHB2        | 0,5  | 0,6                 | 0,0  | 0,6  | 0,5  | 4,8 |          |                |  |
| 18 | chr17 | 27229719  | 27229835  | -      | 116    | 1/4                                 | 80,17 | -60,5  | 0,521551724 | Y          | NM_144683    | DHRS13      | 1,2  | 1,5                 | 5,7  | 3,0  | 1,5  | 2,7 | 2,7      |                |  |
| 19 | chr19 | 18547687  | 18547782  | -      | 95     | 4/10                                | 76,84 | -34,2  | 0,36        | Y          | NM_016368    | ISYNA1      | 1,8  | 2,9                 | 3,5  | 1,2  | 2,5  | 1,2 | 1,2      |                |  |
| 20 | chr20 | 3641511   | 3641590   | -      | 79     | 2/5                                 | 84,81 | -47,9  | 0,606329114 | Y          | NM_022139    | GFRA4       | 1,2  | 1,2                 | 3,5  | 2,1  | 1,3  | 2,3 | 2,3      |                |  |
| 21 | chr1  | 156877843 | 156877919 | +      | 76     | 8/22                                | 75    | -27,3  | 0,359210526 | Y          | NM_001080471 | PEAR1       | 1,0  | 1,7                 | 1,2  | 2,8  | 2,6  | 5,3 |          |                |  |
| 22 | chr13 | 113832290 | 113832487 | -      | 197    | 14/14                               | 48,22 | -53,6  | 0,272081218 |            | NM_018386    | PCID2       | 0,3  | 0,3                 | 0,1  | 0,4  | 0,7  | 0,4 | 0,4      |                |  |
| 23 | chr17 | 76116913  | 76117093  | -      | 180    | 11/18                               | 60    | -65,6  | 0,364444444 |            | NM_001127198 | TMC6        | 0,0  | 0,0                 | 0,1  | 0,3  | 0,0  | 0,2 | 0,2      |                |  |
| 24 | chr19 | 30312725  | 30312902  | +      | 177    | 8/11                                | 82,73 | -56,4  | 0,318644068 | Y          | NM_001238    | CCNE1       | 6,1  | 10,6                | 12,5 | 9,8  | 8,2  | 7,7 | 7,7      |                |  |
| 25 | chr20 | 32247356  | 32247458  | -      | 102    | 8/12                                | 70,59 | -64,6  | 0,633333333 |            | NM_031231    | NECAB3      | 0,2  | 0,2                 | 0,0  | 0,5  | 0,1  | 0,9 | 0,9      |                |  |
| 26 | chr11 | 209318    | 209406    | +      | 88     | 2/9                                 | 69,32 | -45,3  | 0,514772727 |            | NM_021932    | RIC8A       | 0,1  | 0,1                 | 0,0  | 0,1  | 0,0  | 0,5 | 0,5      | = hsa-miR-6743 |  |
| 27 | chr14 | 35099160  | 35099316  | -      | 156    | 1/13                                | 74,36 | -71,6  | 0,458974359 | Y          | NM_152233    | SNX6        | 0,1  | 0,1                 | 0,0  | 0,2  | 0,1  | 1,6 | 1,6      |                |  |
| 28 | chr19 | 436431    | 436629    | -      | 198    | 5/12                                | 71,72 | -95,6  | 0,482828283 | Y          | NM_012435    | SHC2        | 0,0  | 0,0                 | 0,0  | 0,4  | 0,0  | 0,6 | 0,6      |                |  |
| 29 | chr19 | 49422379  | 49422450  | +      | 71     | 9/11                                | 70,42 | -43,4  | 0,611267606 |            | NM_006184    | NUCB1       | 0,5  | 0,5                 | 0,2  | 1,3  | 0,4  | 0,4 | 0,4      |                |  |
| 30 | chr22 | 50699725  | 50699813  | -      | 88     | 1/11                                | 87,5  | -50    | 0,568181818 | Y          | NM_002969    | MAPK12      | 0,5  | 0,7                 | 0,0  | 0,7  | 0,5  | 1,5 | 1,5      |                |  |
| 31 | chr11 | 721991    | 722090    | +      | 99     | 11/20                               | 74,75 | -43,3  | 0,437373737 |            | NM_022772    | EPS8L2      | 0,0  | 0,1                 | 0,0  | 0,1  | 0,2  | 0,0 | 0,0      |                |  |
| 32 | chr16 | 111279    | 111382    | -      | 103    | 10/17                               | 83,5  | -49,8  | 0,483495146 | Y          | NM_022450    | RHBDF1      | 0,3  | 0,5                 | 0,1  | 0,8  | 0,4  | 0,5 | 0,5      |                |  |
| 33 | chr19 | 1083065   | 1083141   | +      | 76     | 20/22                               | 75    | -33,1  | 0,435526316 | Y          | NM_012292    | ARHGAP45    | 1,2  | 2,8                 | 8,8  | 3,6  | 4,9  | 2,1 | 2,1      |                |  |
| 34 | chr19 | 50306262  | 50306363  | +      | 101    | 17/23                               | 71,29 | -42,9  | 0,424752475 |            | NM_014203    | AP2A1       | 0,3  | 0,1                 | 0,0  | 0,4  | 0,3  | 0,0 | 0,0      |                |  |
| 35 | chr3  | 9882300   | 9882381   | -      | 81     | 4/7                                 | 62,96 | -35,3  | 0,435802469 |            | NM_001142547 | RPUSD3      | 0,4  | 0,5                 | 0,2  | 0,7  | 0,6  | 0,6 | 0,6      |                |  |
| 36 | chr11 | 64064751  | 64064938  | +      | 187    | 4/6                                 | 65,78 | -73,9  | 0,395187166 |            | NM_033310    | KCNK4       | 0,8  | 2,3                 | 3,9  | 0,8  | 4,9  | 3,8 | 3,8      |                |  |
| 37 | chr16 | 28620180  | 28620379  | -      | 199    | 1/7                                 | 60,3  | -79,07 | 0,397336683 |            | NM_177530    | SULT1A1     | 0,0  | 0,1                 | 0,0  | 0,1  | 0,3  | 0,8 | 0,8      |                |  |
| 38 | chr19 | 1877424   | 1877506   | -      | 82     | 5/5                                 | 84,15 | -37,9  | 0,462195122 | Y          | NM_031213    | ABHD17A     | 1,1  | 2,1                 | 2,9  | 1,8  | 1,0  | 2,6 | 2,6      |                |  |
| 39 | chr19 | 52207439  | 52207522  | +      | 83     | 6/7                                 | 80,72 | -43,2  | 0,520481928 | Y          | NR_024330    | SPACA6      | 6,3  | 15,1                | 11,8 | 9,9  | 20,1 | 6,7 | 6,7      |                |  |
| 40 | chr3  | 50311077  | 50311189  | +      | 112    | 10/18                               | 75,89 | -64,3  | 0,574107143 | Y          | NM_004636    | SEMA3B      | 0,1  | 0,4                 | 0,0  | 0,2  | 0,2  | 5,1 | 5,1      |                |  |
| 41 | chr4  | 995949    | 996056    | +      | 107    | 7/13                                | 79,44 | -43,5  | 0,406542056 | Y          | NM_000203    | IDUA        | 0,1  | 0,0                 | 0,0  | 0,3  | 0,1  | 0,0 | 0,0      |                |  |
| 42 | chr8  | 144917900 | 144917989 | -      | 89     | 6/6                                 | 82,02 | -46,2  | 0,519101124 | Y          | NM_178564    | NRBP2       | 26,2 | 4,7                 | 20,2 | 9,1  | 0,6  | 0,8 | 0,8      |                |  |
| 43 | chr5  | 139936857 | 139937012 | -      | 155    | 1/4                                 | 70,21 | -33,04 | 0,21316129  | Y          | NM_001035235 | SRA1        | 2,2  | 1,1                 | 18,8 | 9,6  | 32,0 | 2,6 | 2,6      |                |  |
| 44 | chr8  | 145625475 | 145625559 | -      | 84     | 9/37                                | 77,38 | -39    | 0,464285714 |            | NM_013291    | CPSF1       | 0,6  | 0,0                 | 0,0  | 0,0  | 0,0  | 0,0 | 0,0      | = hsa-miR-1234 |  |
| 45 | chr5  | 177558055 | 177558237 | +      | 182    | 1/10                                | 72,53 | -88,3  | 0,485164835 | Y          | NM_022762    | RMND5B      | 0,3  | 0,1                 | 1,0  | 0,0  | 0,0  | 0,1 | 0,1      |                |  |
| 46 | chr8  | 145634556 | 145634672 | -      | 116    | 1/37                                | 83,62 | -69,1  | 0,595689655 | Y          | NM_013291    | CPSF1       | 35,5 | 28,7                | 31,1 | 10,7 | 0,6  | 1,6 | 1,6      |                |  |
| 47 | chr5  | 179222684 | 179222786 | +      | 102    | 2/4                                 | 82,35 | -62,4  | 0,611764706 | Y          | NM_145867    | LTC4S       | 0,0  | 0,0                 | 5,5  | 0,0  | 0,0  | 0,0 | 0,0      |                |  |
| 48 | chr8  | 145649305 | 145649423 | -      | 118    | 9/9                                 | 73,73 | -59,1  | 0,500847458 |            | NM_016208    | VPS28       | 0,1  | 0,3                 | 0,3  | 0,0  | 0,0  | 0,0 | 0,0      |                |  |
| 49 | chr6  | 31938924  | 31939096  | -      | 172    | 2/6                                 | 49,42 | -50,9  | 0,295930233 |            | NM_005510    | DOM3Z       | 0,6  | 0,0                 | 0,4  | 0,0  | 0,1  | 0,0 | 0,0      |                |  |
| 50 | chr9  | 139836918 | 139836998 | -      | 80     | 1/4                                 | 83,75 | -47,9  | 0,59875     | Y          | NM_018998    | FBXW5       | 1,1  | 0,4                 | 2,5  | 0,3  | 0,1  | 0,0 | 0,0      |                |  |
| 51 | chr6  | 33381334  | 33381512  | +      | 178    | 6/14                                | 51,69 | -38,8  | 0,217977528 |            | NM_024165    | PHF1        | 0,3  | 0,2                 | 0,6  | 0,2  | 0,5  | 0,0 | 0,0      |                |  |
| 52 | chr9  | 140128393 | 140128560 | +      | 167    | 9/12                                | 76,05 | -47,07 | 0,281856287 |            | NM_080877    | SLC34A3     | 1,0  | 0,5                 | 11,7 | 0,9  | 1,0  | 0,0 | 0,0      |                |  |
| 53 | chr7  | 76140054  | 76140219  | +      | 165    | 1/6                                 | 71,52 | -82,1  | 0,497575758 |            | NM_182684    | UPK3B       | 0,0  | 0,0                 | 0,0  | 0,0  | 0,1  | 7,4 | 7,4      |                |  |
| 54 | chrX  | 135579598 | 135579782 | +      | 184    | 1/9                                 | 79,35 | -106,7 | 0,579891304 | Y          | NM_001163280 | HTATSF1     | 0,0  | 0,0                 | 0,0  | 0,0  | 0,0  | 0,0 | 0,0      |                |  |
| 55 | chr7  | 100174400 | 100174524 | -      | 124    | 11/15                               | 64,52 | -40,89 | 0,329758065 |            | NM_002319    | LRCH4       | 0,0  | 0,0                 | 0,0  | 0,0  | 0,1  | 0,0 | 0,0      |                |  |
| 56 | chrX  | 153285049 | 153285127 | -      | 78     | 1/13                                | 87,18 | -49,2  | 0,630769231 | Y          | NM_001569    | IRAK1       | 0,0  | 0,1                 | 0,0  | 0,0  | 0,0  | 0,0 | 0,0      |                |  |



**Supplementary Table S2** List of all oligonucleotides used in this study.

| <b>Oligonucleotide name</b> | <b>Oligonucleotide sequence (5' → 3')</b>           | <b>Use in *</b> |
|-----------------------------|-----------------------------------------------------|-----------------|
| mir1224 RTSL                | GTTGGCTCTGGTGCAGGGTCCGAGGTATTCGCACCAGAGCCAACCCACCT  | RTSL            |
| mir1224 RTSL for            | GTTGTTTGTGAGGACTCGGG                                | qPCR            |
| pre-mir1224 for             | GTGAGGACTCGGGAGGTGG                                 | qPCR            |
| pre-mir1224 rev             | CTGAGGAGAGAGGAGGTGGGG                               | qPCR            |
| miR199a2 RTSL               | GTTGGCTCTGGTGCAGGGTCCGAGGTATTCGCACCAGAGCCAACCTAACCA | RTSL            |
| miR199a2 RTSL for           | TGGTGACAGTAGTCTGCACAT                               | qPCR            |
| pre-mir199a2 for            | GGAGGCTTTTCCTGAGGAC                                 | qPCR            |
| pre-mir199a2 rev            | CCCTAGTGTGCAAAACCTGT                                | qPCR            |
| miR10a RTSL                 | GTTGGCTCTGGTGCAGGGTCCGAGGTATTCGCACCAGAGCCAACCACAAA  | RTSL            |
| mir10a RTSL for             | TGTTTTTTTTTACCCTGTAGATCCGAA                         | qPCR            |
| SRA-miRNA RTSL              | GTTGGCTCTGGTGCAGGGTCCGAGGTATTCGCACCAGAGCCAACAGCGCC  | RTSL            |
| SRA-miRNA RTSL for          | GTTTTTTTGCTGGGGGCG                                  | qPCR            |
| pre-SRA-miRNA for           | GGCGGGCTAGGGCACTAGG                                 | qPCR            |
| pre-SRA-miRNA rev           | CGGAGGCGAGGGATGTGTGAAGC                             | qPCR            |
| Universal rev               | GTGCAGGGTCCGAGGT                                    | qPCR            |
| SRA Ex4 rev                 | CGCCTGGCACTGCTGCAGGAAC                              | PCR             |
| SRA In1 for                 | GCTAGGGCACTAGGTTGTTCGC                              | PCR             |
| SRA In4 for                 | ATTGACTGGGAGGGGAGGCATGGAAG                          | PCR             |
| SRA In4 rev                 | GAAGAGAGACGGGGGTTGAGCAAGC                           | PCR             |
| U6 for                      | CTCGCTTCGGCAGCACA                                   | PCR, qPCR       |
| U6 rev                      | AACGCTTCACGAATTTGCGT                                | PCR, qPCR       |
| GAPDH for                   | CTTCACCACCATGGAGAAGGC                               | PCR             |
| GAPDH rev                   | GGCATGGACTGTGGTCATGAG                               | PCR             |

|                   |                                                             |              |
|-------------------|-------------------------------------------------------------|--------------|
| U6                | TGGAACGCTTCACGAATTTGCGTGTCATCCTTGCGCAGGGGCCATG              | Array        |
| Int4 SRA          | GTACAAGAGCTTCCATGCCTCCCCTCCCAGTCAATCAAAA                    | Array        |
| ex4 SRA           | TTGACAACCTTTCCTCCAGCCCCTGTTCTGCAGCAGTGCCAGGCG               | Array        |
| Random 1          | CGAGCACAAAGGAACATCCGCCCACCACGCCCTGGTAACAT                   | Array        |
| Random 2          | CTTGTAGTAGGGGGAGAATAAGCACCATCGAAGTCGTTAGGTCTTT              | Array        |
| ex4 GAPDH         | ACAGCCTTGGCAGCGCCAGTAGAGGCAGGGATGATGTTCT                    | Array        |
| mir-21            | CATGAGATTCAACAGTCAACATCAGTCTGATAAGCTACCCGACA                | Array        |
| Dicer for         | TGGGTCCTTTCTTTGGACTG                                        | qPCR         |
| Dicer rev         | CTGGTTTGCAGAGTTGACCA                                        | qPCR         |
| DGCR8 for         | CAAGCAGGAGACATCGGACAAG                                      | qPCR         |
| DGCR8 rev         | CACAATGGACATCTTGGGCTTC                                      | qPCR         |
| DBR1 for          | GGAAACCATGAAGCCTCAAA                                        | qPCR         |
| DBR1 rev          | CCGATCCTTACACCTCGGTA                                        | qPCR         |
| Drosha for        | TAGGCTGTGGGAAAGGACCAAG                                      | qPCR         |
| Drosha rev        | GTTCGATGAACCGCTTCTGATG                                      | qPCR         |
| U2AF65 for        | CCCAGGCTTTGAGCACATCA                                        | qPCR         |
| U2AF65 rev        | GCATGGCCTTGTACTGCATTG                                       | qPCR         |
| PRP8 for          | CCCCGCTACCGGACTACAT                                         | qPCR         |
| PRP8 rev          | GCCATTTTCGAGCTTTCTCCTG                                      | qPCR         |
| snRNP70 for       | TCGTGGCGAGAGTGAATTATGA                                      | qPCR         |
| snRNP70 rev       | TGATAGGTCCGTACACCTCAAA                                      | qPCR         |
| Ago2 for          | TCCACCTAGACCCGACTTTGG                                       | qPCR         |
| Ago2 rev          | GTGTTCCACGATTTCCCTGTT                                       | qPCR         |
| Bait SRA Intron 1 | AAGGCTGGGGGCGGTTGCGGCGCTTAGTATGGACCCTCTGTCTCCCCCAGCTATAGTGA | Pulldown     |
| Bait Luciferase   | AAGGCTTACGCTGAGTACTTCGACTTGCTTCTCGAAGTACTCAGCGTAAGTATAGTGA  | Pulldown     |
| sh DBR1-1         | AAGGATCGGTGGAATCTCTGGCTTGCTTCCCAGAGATTCCACCGATCCTATAGTGA    | interference |

|            |                                                                |              |
|------------|----------------------------------------------------------------|--------------|
| sh DBR1-2  | AAGGCGAGGCGGATCTACGCTGCCTTGCTTCGCAGCGTAGATCCGCCTCGCCTATAGTGA   | interference |
| sh DBR1-3  | AAGGTGTGACTGGGCGCCTGTGGCTTGCTTCCCACAGGCGCCAGTCACACCTATAGTGA    | interference |
| sh snRNP70 | AAGGTCTACAGTAAGCGGTCATTCTTGCTTCAATGACCGCTTACTGTAGACCTATAGTGA   | interference |
| sh PRP8    | AAGGCCCATCATGTGAACAACGATTCTTGCTTCAATCGTTGTTACATGATGGGTATAGTGA  | interference |
| sh U2AF65  | AAGGCCAACTACCTGAACGATGATTCTTGCTTCAATCATCGTTCAGGTAGTTGGTATAGTGA | interference |
| sh Ago2-1  | AAGCACGACTGTGGACACGAACTTGCTTCTTCGTGTCCACAGTCGTGCTATAGTGA       | interference |
| sh Ago2-2  | AACAAGCAGGCCTTCGCACTACTTGCTTCTAGTGCGAAGGCCTGCTTGTATAGTGA       | interference |
| sh Luc     | AAGGCTTACGCTGAGTACTTCGACTTGCTTCTCGAAGTACTCAGCGTAAGTATAGTGA     | interference |
| Cand1      | GGGCACAGAGGAGAGAGGCCTTCAGGCTAGGTAGGCGCCCC                      | Array        |
| Cand2      | CCCCGCCACCTCCCAGCGCAGTGACTTGCCCTGGCAACT                        | Array        |
| Cand3      | GGGTAACGACACAGGGGTCAGCCTAGTCCAGGACGGACCC                       | Array        |
| Cand4      | ACGCGCGGTTAGAACGACCCCAGCCCCGGGCCACATCGCATCTC                   | Array        |
| Cand5      | GGTTGGCGTGGGTGCGGGGACGGGACAGGTTTCGTTCGTGCCC                    | Array        |
| Cand6      | TGCTGGTAGAAGGCTGTGGGGCCAGGACGGATCTGATGGGGGTGGGT                | Array        |
| Cand7      | GCGCGACGCCAGGGTCGGCTACTGGGGGGCCTCGGGCTCTAC                     | Array        |
| Cand8      | GCCCCGCCGCGGGTCCTCCGCCCGCCGGCTCGCTCGCTCAC                      | Array        |
| Cand9      | CGAGCGCGGACCCGGGAGAGAGCTCTCATTCAACGCTGAGGCCACT                 | Array        |
| Cand10     | ACACAACCTAGGACTTCCCAGACTCCACCCCATCGGTCTCCCCA                   | Array        |
| Cand11     | TCCCAGGCTGGCTTCTCAGCACCCACCACCCCACTCCGGAAACCAT                 | Array        |
| Cand12     | TGCGGCAACGCAGGGGAGGGCGGTCAGGGCTGCGGGTGCTGC                     | Array        |
| Cand13     | CTGAGTTAAAGAGGGCGGTAGGGAGGCGGTTAGGGAGGCCGGCC                   | Array        |
| Cand14     | CTGCGGGTGAGTGGGTAGGCGCAGGGGACGGTGCCAACTG                       | Array        |
| Cand15     | CTGCGGGCAGGGGAGGGCGCGGGCAGCTGGTGCTGGTGCC                       | Array        |
| Cand16     | AGAGGCTGACCTTGACCACCCCCACCCCCGACTCCATCCCTCC                    | Array        |
| Cand17     | AGGGAGACCCTGTCCTGGGTGAGGAGCCCCACCCATGGAGTCTTTC                 | Array        |
| Cand18     | GGCCTCCTCTCCGCGCGCCCCGCCAGCTCGCACTACCCG                        | Array        |

|        |                                                    |       |
|--------|----------------------------------------------------|-------|
| Cand19 | ACTCGGCCCTGCCCGGATCCTGGGCCCCCTCCAGACCCCATC         | Array |
| Cand20 | GCGGTGAGCCGGAGAGAGGCCCCCGTCCCCACCCTCGCCAC          | Array |
| Cand21 | CTGGGCACCTAGCTGAGTGAGCCTGGCGGGCGCCCCACCTCCTCCCTCCC | Array |
| Cand22 | CTCAGCCTCAGCATCCCTGGGAAAAGCGCCTCCAAGAGTTCCG        | Array |
| Cand23 | GGTCACACCGGCCTCATCCTAAGTAGGTTTGGATACACCCGGAGCT     | Array |
| Cand24 | GTGAGCACCCGCGGCCGCCCTCCCCACGCCACCCGTCC             | Array |
| Cand25 | TACCAGGAGGGTCTCCTTGTGGGGCCCTGGCCCCACGGC            | Array |
| Cand26 | GGCAGGGAGAAGAGCGGCTCCACCAGGCCCTTCTTCCTGGGGCCACC    | Array |
| Cand27 | AGGATGAGATGGGGGAGACACAAAGGGAGACATTAGTGACAGGCTGGCG  | Array |
| Cand28 | GCACAGGGTACGTTAGGCGGGCTCTGGGGAAGGATGAGAGGGTCTCGC   | Array |
| Cand29 | GAGCCAGATAAGGGTGAGTGACAGAGCTGGGGGCCCCGTCCTCTCC     | Array |
| Cand30 | GCGGACCGCTTAGCGGGAAGGCCGGGCACCCCGCGCAGGC           | Array |
| Cand31 | GTGGGAACAAGTGAGCAGGTGCCGGGGCGGGGCGGGGCCTC          | Array |
| Cand32 | GGCGAGGGAGACGAGCGGCCGCAGTCCGGGGCCTCCTGCC           | Array |
| Cand33 | GCTCCCGGGACCCCGCGCCCTCCACTCCATATGCCGGGACTC         | Array |
| Cand34 | GGGGCGCAAGATGACGGGGGTGCCTGTCTGCACCTGGCCTGGGCTCCG   | Array |
| Cand35 | CACAGGGTGGCTTGCTGGGACCTCCCCACCACTCTAGGAACCTCCCAG   | Array |
| Cand36 | CAGGAGACACCAACAATCCCCACTCCCATACTCCCCACTCCC         | Array |
| Cand37 | CAGTGGCGGGGCTGGGGCTGAAAACCAGGTCGGGCTCTAATGCGGTGGT  | Array |
| Cand38 | GTCGTGGAGCCGGTGAGACTTCGCGCCCCGGCCCCGGGCCCC         | Array |
| Cand39 | AGGCACGAGCCCCACCCCTCTCCCGACCCCGCTCACTCAC           | Array |
| Cand40 | CTGCGGGGAAGGGGCCTAGCTGGGGTAGGGCGCACAGCCC           | Array |
| Cand41 | GTGGCGCGGCCACCGCTCGCCTGTCCCGTCTCGGGAGGAA           | Array |
| Cand42 | GCCTGCCCCGTGCGCCCCCTCCGCCAGGCCGCGCCGCACC           | Array |
| Cand43 | AGAGGGTCCATACTAAGCGCCGCAACCGCCCCAGCCTAGGCCGGGGCG   | Array |
| Cand44 | CTGTGGGGTGGGTGGTCAGGCCGACTAGGCAGGCCCAAGC           | Array |



|        |                                                    |       |
|--------|----------------------------------------------------|-------|
| Cand45 | CAAGCCCAAGGGCAGATTGTTTCGGGGCTTAGTCGTGGGTAGCAGGGGT  | Array |
| Cand46 | CGCACCGCGCCCCTCCCCGGCCTCGCGCTGCCGCCTCGGC           | Array |
| Cand47 | GCGGGTGGGATGAGCGCGCCGGCCGGGATGGTCCTGCGAC           | Array |
| Cand48 | GCAGCACAGGGCATGTGGGGGCTGAGGGCCTCAGGGGCACTGCGGG     | Array |
| Cand49 | GGAGTTACAGGCTGAAGGTCTGACACAAGCATTAGTGAGATGCTCCCCTC | Array |
| Cand50 | GGCCCCAGGAGGGCAGCCCCGCCCTAGCCCCGCACGCAC            | Array |
| Cand51 | CTGAGGGGGAACACAGGACTTCTGGCCTCCAGAAACCCCTTCCCCA     | Array |
| Cand52 | CGGGGCTGTGCTGTTCTCTCCATGTAGGGGCCGGTGAGGGGGAG       | Array |
| Cand53 | TGTGGCCACGGGGGACAAAAGGTGAGCCACGGAGACGGGC           | Array |
| Cand54 | AGCAGTCCCCGGGAAATCGCGGCCGCTCGGCGGCTGCACC           | Array |
| Cand55 | AACCAGGGACACAGCGACAGGGGCAGGTGAGACAGGCATC           | Array |
| Cand56 | GGGGGCGTCAGGCGTCGGCGCCAGGAGCCCCGCGCGCCTC           | Array |
| #1F    | CATCAGCCTCACTGTGGCCAAG                             | rPCR  |
| #1R    | CTCCTGTCAGTGCCGCCGTGTG                             | rPCR  |
| #2F    | GAGGGACCTCACTCCAGGGCAC                             | rPCR  |
| #2R    | GACCTGCGGCAGCTCAGAGAAG                             | rPCR  |
| #3F    | GCTCCCACCGGACGCCATCTTC                             | rPCR  |
| #3R    | GGTAGCCTGGGTTGTGATAGTC                             | rPCR  |
| #4F    | CATGGCGACTTTGGTCGAACTG                             | rPCR  |
| #4R    | GTGTAGAGCGTCAGGTCGACATG                            | rPCR  |
| #5F    | CTTGCTGACGCTGCGGGCCAAG                             | rPCR  |
| #5R    | GTGCAACAGCTCCGGAGAGGAG                             | rPCR  |
| #6F    | GAGTCACCCACTTGCAATCTG                              | rPCR  |
| #6R    | CGAGTTGACAGAGAATCCGGAG                             | rPCR  |
| #7F    | CCGGAAGTGACGTCTCCCAGAG                             | rPCR  |
| #7R    | CCACTCATCTTCGTTGTCCTGG                             | rPCR  |

|       |                          |      |
|-------|--------------------------|------|
| #8F   | GATCCTGTGGCCTGCTTCCTGA   | rPCR |
| #8Rb  | GATGGAGCAGGTGTGCTGCGAC   | rPCR |
| #9F   | GGAGTGCGATCGCCTGCGGATC   | rPCR |
| #9R   | CCTGCCTGCCTCCTCCGTGCTG   | rPCR |
| #10F  | GTCCTCTATGCTGCCACTGTGAA  | rPCR |
| #10R  | TCGTCTGCTCCATCTTCATCCC   | rPCR |
| #11F  | GAAGCTGCAGGAATACCGGGTC   | rPCR |
| #11R  | GACTCTCAGGCTCCATGCAGTG   | rPCR |
| #14F  | CGTGGTGACTGATCTTCGTGGC   | rPCR |
| #14R  | GTCGTGGCGGATGACCTCATTG   | rPCR |
| #15F  | CATCGACGGCATCGGCAGCTTC   | rPCR |
| #15R  | CCACCTCCTCTAGGCAGTAATG   | rPCR |
| #16F  | CCTGCTGGAGGTGGTGCTGTT    | rPCR |
| #16R  | CTGGCGGTGCTTGCTCTTCTC    | rPCR |
| #17F  | CATCTTGGCAGCCTCGGCCTCAC  | rPCR |
| #17R  | GCCGAGAGTACACAGCTGCTG    | rPCR |
| #18Fb | AGCTCCAGCGCCGTCATCTTTC   | rPCR |
| #18R  | GGCGCTTACGTGCTTGTCTACT   | rPCR |
| #19F  | CGTGAGCCTGGGCCTGGAC      | rPCR |
| #19R  | CTCCATGTGCGGCCACAGTTG    | rPCR |
| #20F  | GAGACCTGAAAGGCCAGGAG     | rPCR |
| #20Rb | GCGTCGGCGCCAGACCTTCGTG   | rPCR |
| #21F  | CCAGGAATGTCGCTGCCACAA    | rPCR |
| #21R  | TGAAGCCGTGTTTCGCACAGAC   | rPCR |
| #24F  | GTTTGCGTATGTGACAGATGGAGC | rPCR |
| #24R  | GCGGCAGTAGCACTTCATGTAAGT | rPCR |

|       |                          |      |
|-------|--------------------------|------|
| #27F  | TCGCCTCGGAGCAGCCATGATG   | rPCR |
| #27R  | TCCACCTGCAGAGCAGCATCAC   | rPCR |
| #29F  | GAGATGGAGGAGGAGCGACTGC   | rPCR |
| #29R  | CCTTCCTCTGAGTGGATGCGAG   | rPCR |
| #30F  | GACCAAGACGGCCTGGGAGGTG   | rPCR |
| #30R  | GCTTGGCGAACAGCTCGGACTG   | rPCR |
| #33Fb | CGGCTCGGAGAGCGAGGCAGTG   | rPCR |
| #33R  | TGTTGTCCTGCTCCACCTCCA    | rPCR |
| #36F  | GCATCGGTCACATTGAAGCCATC  | rPCR |
| #36R  | CCAGTCCTCCATATAGCAGAACAC | rPCR |
| #38F  | GACCTACTGCTTCGACGCCTTC   | rPCR |
| #38R  | GTCCTCCGTGCCGTGGATGAT    | rPCR |
| #39Fb | CGAAGGATACCTGGCGCGGATC   | rPCR |
| #39R  | GCCTGCAACTCTGTCTCCGC     | rPCR |
| #40F  | CAAGTGGACGACGTTCTGAAG    | rPCR |
| #40R  | TGGAGAAGACGGCATAGAGCAG   | rPCR |
| #42F  | GCTCGTGCACTATGGCTTCC     | rPCR |
| #42R  | GGTCCCACGGTACTTGAGG      | rPCR |
| #43F  | ATGGCGGAGCTGTACGTGAAGCCG | rPCR |
| #43R  | GCGACCCTCTTGGTAAGCAG     | rPCR |
| #45Fb | GCTTCCGGTTCCGATGACAGTG   | rPCR |
| #45Rb | GACGTTTGAGTCCGAGCAACTC   | rPCR |
| #46F  | GGACTGAGTTCGCTGCTGTC     | rPCR |
| #46R  | GGTTGCGCTCGCTGTTGTTG     | rPCR |
| #47F  | CTTCTCCCTGCAGGTGATCTCG   | rPCR |
| #47R  | ATGCCGGCGACCCAGAGCG      | rPCR |

|       |                                           |      |
|-------|-------------------------------------------|------|
| #50F  | CTATGACGTGTTTGGCTGTTGGC                   | rPCR |
| #50R  | GTGCTGGCATTGAGGTTCTGG                     | rPCR |
| #52F  | GGCCCGTGCACAGAGAAGAAC                     | rPCR |
| #52R  | GACCAGGCAGCCGCAGAG                        | rPCR |
| #53F  | TCACCTAGGGCTGCAGATGCTC                    | rPCR |
| #53R  | TGGTGGCTGTGACCTTCCCTTC                    | rPCR |
| In8F  | GTGAGCGAGCGAGCCGGCG                       | RIP  |
| In8R  | CCTGACCAGCCCTCCTGCTCAG                    | RIP  |
| In16F | GAGAGTCTGGGGAGGGATG                       | RIP  |
| In16R | GTCAAGGTCAGCCTCTGAGCCAG                   | RIP  |
| In18F | GGCGGGAGCCGAGCTGAG                        | RIP  |
| In18R | GGCCTCCTCTCCGCGCGCCCCGCCAGCTCGCACTCACCCG  | RIP  |
| In19F | GGGGGACCCTCACACTCG                        | RIP  |
| In19R | AGACCCCATCTCCCATCC                        | RIP  |
| In20F | GCGGTGAGCCGGAGAGAGGCCCCCGTCCCCACCCTCGCCAC | RIP  |
| In20R | CACGGCCCCGCCGCCG                          | RIP  |
| In24F | CCAGTGAATTTTCCGGCCATT                     | RIP  |
| In24R | GCATGGAACATGGCTGCATT                      | RIP  |
| In39F | AGTGAGCGGGGTCGGGAGAG                      | RIP  |
| In39R | CTCGTGCCTGGCTGACGTG                       | RIP  |
| In45F | CTTCTCCAGAACCCCTGCTACCC                   | RIP  |
| In45R | GCCCTTGGGCTTGTTCTCTTCG                    | RIP  |
| In46F | TGCGCAAGGCCGGGAGA                         | RIP  |
| In46R | GTGAGCGGGGTCGCCCA                         | RIP  |

\* RTSL, Stem Loop RT-qPCR; qPCR, quantitative PCR ; PCR, RT-PCR; Pulldown, RNA pull down; interference, RNA interference; rPCR, radioactive PCR; RIP, native RNA Immunoprecipitation.

**Supplementary Table S3** Synthesis of data shown in Figures 3, 4 and 5. \*\*\*, p<0.05; ns, not significant; nd, not determined; sh, RNA interference; RIP, native RIP.

|            | Drosha |     | DGCR8 |     | U1+PRP8 | U1  | U2+PRP8 | U2  | DBR1 |     | Dicer |     | Ago2 |     |              |
|------------|--------|-----|-------|-----|---------|-----|---------|-----|------|-----|-------|-----|------|-----|--------------|
|            | sh     | RIP | sh    | RIP | sh      | RIP | sh      | RIP | sh   | RIP | sh    | RIP | sh   | RIP |              |
| <b>#8</b>  | ns     | *** | ns    | ns  | ns      | *** | ns      | ns  | ***  | *** | ***   | nd  | ns   | ns  | mirtron-like |
| <b>#10</b> | ns     | nd  | ns    | nd  | ns      | nd  | ns      | nd  | ns   | nd  | ***   | nd  | ns   | nd  |              |
| <b>#16</b> | ***    | *** | ***   | *** | ns      | ns  | ns      | ns  | ns   | ns  | ***   | nd  | ns   | *** | miRNA        |
| <b>#18</b> | ***    | *** | ***   | *** | ns      | ns  | ns      | ns  | ns   | ns  | ***   | nd  | ns   | *** | miRNA        |
| <b>#19</b> | ***    | *** | ***   | *** | ns      | ns  | ns      | ns  | ns   | ns  | ***   | nd  | ns   | ns  | miRNA        |
| <b>#20</b> | ***    | *** | ***   | *** | ns      | ns  | ns      | ns  | ns   | ns  | ***   | nd  | ns   | *** | miRNA        |
| <b>#21</b> | ns     | nd  | ns    | nd  | ns      | nd  | ns      | nd  | ns   | nd  | ***   | nd  | ns   | nd  |              |
| <b>#24</b> | ***    | *** | ***   | *** | ns      | ns  | ns      | ns  | ***  | *** | ***   | nd  | ns   | ns  |              |
| <b>#33</b> | ***    | nd  | ns    | nd  | ns      | nd  | ns      | nd  | ns   | nd  | ***   | nd  | ns   | nd  |              |
| <b>#36</b> | ns     | nd  | ns    | nd  | ns      | nd  | ns      | nd  | ns   | nd  | ns    | nd  | ***  | nd  |              |
| <b>#38</b> | ns     | nd  | ns    | nd  | ns      | nd  | ns      | nd  | ns   | nd  | ***   | nd  | ns   | nd  |              |
| <b>#39</b> | ***    | *** | ***   | *** | ns      | ns  | ns      | ns  | ***  | *** | ***   | nd  | ns   | *** |              |
| <b>#42</b> | ***    | nd  | ***   | nd  | ns      | nd  | ***     | nd  | ***  | nd  | ***   | nd  | ns   | nd  |              |
| <b>#43</b> | ***    | *** | ***   | *** | ***     | ns  | ***     | ns  | ***  | *** | ***   | nd  | ***  | *** |              |
| <b>#45</b> | ***    | *** | ns    | ns  | ns      | *** | ***     | ns  | ns   | ns  | ***   | nd  | ns   | *** | simtron-like |
| <b>#46</b> | ***    | *** | ***   | *** | ***     | ns  | ***     | ns  | ***  | *** | ***   | nd  | ns   | *** |              |
| <b>#47</b> | ***    | nd  | ns    | nd  | ns      | nd  | ***     | nd  | ***  | nd  | ***   | nd  | ns   | nd  |              |
| <b>#50</b> | ns     | nd  | ns    | nd  | ns      | nd  | ns      | nd  | ns   | nd  | ***   | nd  | ***  | nd  |              |
| <b>#52</b> | ***    | nd  | ***   | nd  | ns      | nd  | ***     | nd  | ***  | nd  | ***   | nd  | ***  | nd  |              |

## References

1. Burset,M., Seledtsov,I.A. and Solovyev,V.V. (2000) Analysis of canonical and non-canonical splice sites in mammalian genomes. *Nucleic Acids Res.*, **28**, 4364-4375.
2. Affymetrix ENCODE Transcriptome Project and Cold Spring Harbor Laboratory ENCODE Transcriptome Project (2009) Post-transcriptional processing generates a diversity of 5'-modified long and short RNAs. *Nature*, **457**, 1028-1032.
3. Trapnell,C., Williams,B.A., Pertea,G., Mortazavi,A., Kwan,G., van Baren,M.J., Salzberg,S.L., Wold,B.J. and Pachter,L. (2010) Transcript assembly and quantification by RNA-Seq reveals unannotated transcripts and isoform switching during cell differentiation. *Nat. Biotechnol.*, **28**, 511-515.
4. Nielsen,C.B., Shomron,N., Sandberg,R., Hornstein,E., Kitzman,J. and Burge,C.B. (2007) Determinants of targeting by endogenous and exogenous microRNAs and siRNAs. *RNA*, **13**, 1894-1910.
